# Supplementary material for: Reclaiming multi-contaminated soil: melatonin alleviates cadmium and microplastic toxicity to restore rice growth and yield
Source: Royal Society of Chemistry journal article supplement (doi:10.1039/d5ra10106a), 2026-01-01
Supplement: d5ra10106a1.pdf [file d5ra10106a1.pdf]

### **Characterization of microplastics**

The polyvinyl chloride MPs with 50  $\mu\text{m}$  size and a density of  $1.40\text{ g cm}^{-3}$  were used in the study. The microplastic used in the study had an irregular surface and sharp edges according to scanning electron microscopic analysis (Figure S1). Microplastics were also subjected to FTIR analysis, and peaks were seen at 3429.94, 2969.04, 2912.68, 1430.48, 1253.56 and 605.87  $\text{cm}^{-1}$  respectively (Figure S1). These peaks showed that MPs had O-H stretching, C-H stretching, C=C stretching, C-O stretching, and C-H bending (Figure S1).

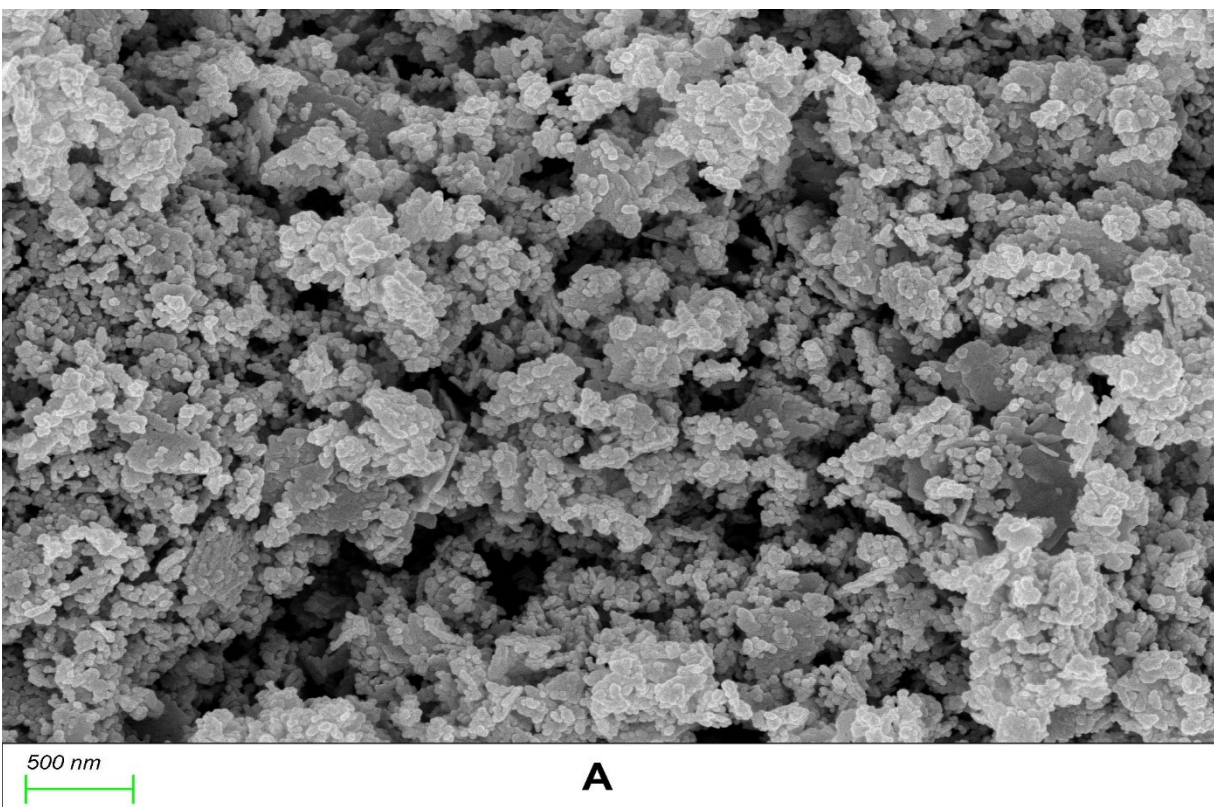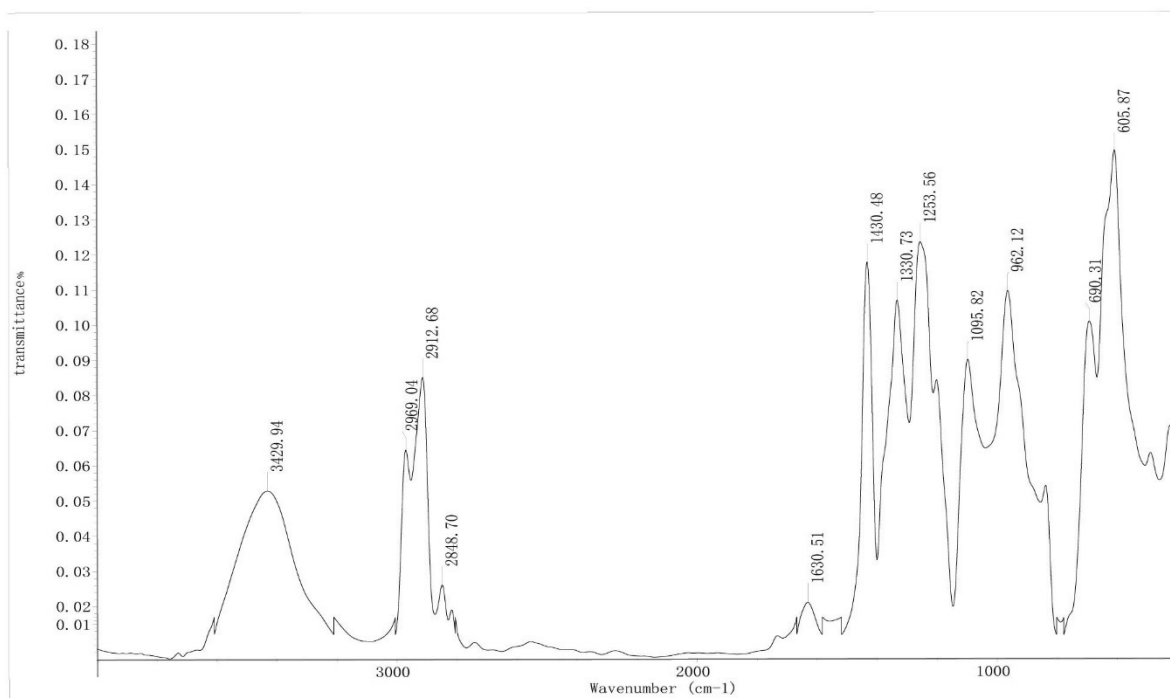

**Figure S1:** Scanning electron microscopic (A) and Fourier Transform Infrared Spectroscopy (B) analysis of microplastics used in the study.

**Table S1: Primers used in the study**

| <b>Gene</b> | <b>Primer</b>         |
|-------------|-----------------------|
| Actin-F     | CATTGGTGCTGAGCGTTTCC  |
| Actin-R     | CCCGCAGCTTCCATTCCTAT  |
| OsNRAMP1-F  | GCCGATCTCAGAAAGGAGCC  |
| OsNRAMP1-R  | TCCAGGATCGAGGTAAGCCA  |
| OsHMA3-F    | TGCTGTGAGAACTACGGCTC  |
| OsHMA3-R    | ATTGCTCAAGGCCATCTGCT  |
| OsAPx6-F    | CCTTCACCTGCGGAACATCT  |
| OsAPx6-R    | AGCACAGCATCAGTAGGCAG  |
| OsCAT-F     | TCGGCATCCCCACCGATTAC  |
| OsCAT-R     | GTCCATCAAGCAGCTGACGC  |
| OsPOD-F     | CAGCTCTCGGCGACGTTCTA  |
| OsPOD-R     | CGAAGCAGTCGTGGAAGTGC  |
| OsSOD-F     | CAATGCAGCCAGAAGGTGGTG |
| OsSOD-R     | ACAAGCCAAACCCAGCCAGA  |
